# Supplementary material for: Creating ultrathin amorphous metal hydroxide and oxide nanosheet libraries
Source: Royal Society of Chemistry journal article supplement (doi:10.1039/c8ta11525g), 2019-01-01
Supplement: c8ta11525g1.pdf [file c8ta11525g1.pdf]

Electronic Supplementary Material (ESI) for Journal of Materials Chemistry A.

This journal is © The Royal Society of Chemistry 2018

## Creating Ultrathin Amorphous Metal Hydroxide and Oxide nanosheets Libraries

BinbinJia, <sup>a</sup>RuiHao, <sup>a</sup>Zhongning Huang, <sup>a</sup>Pengfei Hu, <sup>a</sup>Lidong Li, <sup>\*a</sup> YanZhang<sup>a</sup> and Lin Guo<sup>\*a</sup>

- a. Key Laboratory of Bio-inspired Smart Interfacial Science and Technology of Ministry of Education, Beijing Advanced Innovation Center for Biomedical Engineering, School of Chemistry, Beihang University, Beijing 100191, P. R. China.

### Experimental Section

**Synthesis of Cu<sub>2</sub>O ultrathin nanosheets.** Preparation of lamellar Cu<sub>2</sub>O-oleate complex intermediate: The lamellar Cu<sub>2</sub>O-oleate complex intermediate was synthesized by a hydrothermal method. In a typical procedure, 99 mg CuCl, 914 mg sodium oleate, 831 mg hexamethylenetetramine (HMT) and 100 μL N<sub>2</sub>H<sub>4</sub>·H<sub>2</sub>O were added into 40 mL distilled water orderly. After vigorous stirring for 10 min, the mixed solution was transferred into 50 mL teflon cup and heated in a sealed autoclave at 100 °C for 24 h. Upon cooling to room temperature naturally, the final product was collected by centrifuging the mixture, washed with distilled water and absolute ethanol for several times, and then dried in vacuum at 60 °C overnight for further analysis. 50 mg lamellar Cu<sub>2</sub>O-oleate complex intermediate was put in a quartz boat and then heated at 300 °C for 8 min in air, then the sample was allowed to cool down to room temperature naturally. The Cu<sub>2</sub>O colloidal solution was achieved by dispersing 20 mg calcined product into 10 mL absolute ethanol by ultrasonic for 40 min. The final product was collected by centrifuging the supernatant at 12,000 rpm for 10 min, and then dried in vacuum overnight for further characterization.

**Synthesis of amorphous Co(OH)<sub>2</sub> ultrathin nanosheets.** In a typical synthesis, 5 mg Cu<sub>2</sub>O nanosheets and 2 mg CoCl<sub>2</sub>·5H<sub>2</sub>O were dissolved in mixed solutions including 10 ml deionized water and 10 ml ethanol. And then, the Na<sub>2</sub>S<sub>2</sub>O<sub>3</sub> solution (0.4 m 10 ml) was slowly added to the mixed solutions through a constant pressure titration funnel maintained at 20 °C for 1 h. The precipitate was collected after centrifugation and carefully washed with water and ethanol to clean out remnant salt and dried in vacuum overnight for further characterization.

**Synthesis of amorphous CoO ultrathin nanosheets.** The dried amorphous Co(OH)<sub>2</sub> nanosheets products were under thermo treatment at 250 °C for 1 hours in argon atmosphere, during which the heating rate was 5°C/min.

**Synthesis of amorphous Zn(OH)<sub>2</sub> ultrathin nanosheets.** In a typical synthesis, 5 mg Cu<sub>2</sub>O nanosheets and 3 mg ZnCl<sub>2</sub> were dissolved in mixed solutions including 10 ml deionized water and 10 ml ethanol. And then, the Na<sub>2</sub>S<sub>2</sub>O<sub>3</sub> solution (0.4 m 10 ml) was slowly added to the mixed solutions through a constant pressure titration funnel maintained at 20 °C for 1 h. The precipitate was collected after centrifugation and carefully washed with water and ethanol to clean out remnant salt and subsequently dried in vacuum overnight for further characterization.

**Synthesis of amorphous ZnO ultrathin nanosheets.** The dried amorphous Zn(OH)<sub>2</sub> nanosheets products were under thermo treatment at 250 °C for 1 hours in argon atmosphere, during which the heating rate was 5°C/min.

**Synthesis of amorphous Mg(OH)<sub>2</sub> ultrathin nanosheets.** In a typical synthesis, 5 mg Cu<sub>2</sub>O nanosheets and 1.7 mg MgCl<sub>2</sub> were dissolved in mixed solutions including 10 ml deionized water and 10 ml ethanol. And then, the Na<sub>2</sub>S<sub>2</sub>O<sub>3</sub> solution (0.4 m 10 ml) was slowly added to the mixed solutions through a constant pressure titration funnel maintained at 20 °C for 1 h. The precipitate was collected after centrifugation and carefully washed with water and ethanol to clean out remnant salt and subsequently dried in vacuum overnight for further characterization.

**Synthesis of amorphous MgO ultrathin nanosheets.** The dried amorphous Mg(OH)<sub>2</sub> nanosheets products were treated with calcination at 250 °C for 1 hours in argon atmosphere and the heating rate was 5°C/min.

**Synthesis of amorphous  $Mn(OH)_x$  ultrathin nanosheets.** In a typical synthesis, 5 mg  $Cu_2O$  nanosheets and 2.5 mg  $MnCl_2 \cdot 2H_2O$  were dissolved in mixed solutions including 10 ml deionized water and 10 ml ethanol. And then, the  $Na_2S_2O_3$  solution (0.4 m 10 ml) was slowly added to the mixed solutions through a constant pressure titration funnel maintained at 20 °C for 1 h. The precipitate was collected after centrifugation and carefully washed with water and ethanol to clean out remnant salt and subsequently dried in vacuum overnight for further characterization.

**Synthesis of amorphous  $MnO_x$  ultrathin nanosheets.** The dried amorphous  $Mn(OH)_x$  nanosheets products were treated with calcination at 250 °C for 1 hours in argon atmosphere, during which the heating rate was 5°C/min.

**Synthesis of amorphous  $Fe(OH)_3$  ultrathin nanosheets.** In a typical synthesis, 5 mg  $Cu_2O$  nanosheets and 1.3 mg  $FeCl_2 \cdot 4H_2O$  were dissolved in 20 ml deionized water. And then, the  $Na_2S_2O_3$  solution (0.2 m 10 ml) was slowly added to the mixed solutions through a constant pressure titration funnel maintained at 20 °C for 1 h. The precipitate was collected after centrifugation and carefully washed with water and ethanol to clean out remnant salt and subsequently dried in vacuum overnight for further characterization.

**Synthesis of amorphous  $Fe_2O_3$  ultrathin nanosheets.** The dried amorphous  $Fe(OH)_3$  nanosheets products were under thermo treatment at 250 °C for 1 hours in a argon atmosphere, during which the heating rate was 5 °C/min.

**Material Characterizations.** The morphology of amorphous nanosheets were characterized with a scanning electron microscopy (7500F, JEOL). The transmission electron microscopy (TEM) images were obtained with JEOL JEM- 2100F at an accelerating voltage of 200 kV. Atomic force microscope (AFM) were performed by a Bruker Dimension Icon and the samples were dispersed on mica plate.

**Electrochemical Tests.** The catalysts (1 mg) were dispersed in solvent consisted of 350  $\mu$ L of deionized water, 135  $\mu$ L of alcohol and 15  $\mu$ L of 5 wt% Nafion solution. After sonication for 15 min, 20  $\mu$ L of homogeneous solution was drop onto glassy carbon electrode. The fabrication of working electrodes was finished, after drying at room temperature. Electrochemical Tests were performed in a standard three-electrode system controlled by Pine Instruments electrochemistry workstation. Pt wire work as a counter electrode and Ag/AgCl electrode work as the reference electrode. All potentials measured were calibrated to the reversible hydrogen electrode (RHE) using the following equation:  $ERHE = E_{Ag/AgCl} + 0.197 V + 0.059 pH$ , where  $pH = 14$  in 1 M KOH solution. To get rid of the generated oxygen bubbles, working electrode should be rotated at 1600 rpm. In addition, LSVs were performed at 2  $mV s^{-1}$  for polarization curves and Tafel plots should be tested at the scan rate of 0.1  $mV s^{-1}$ .

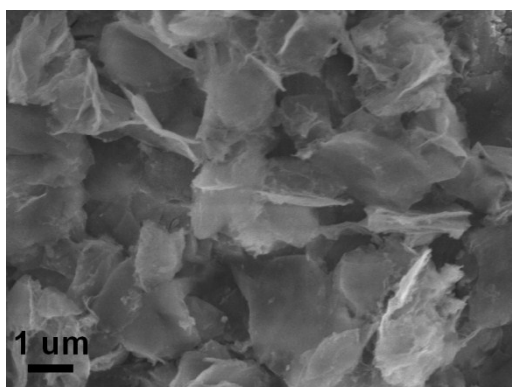

**Figure S1.** SEM images of  $Cu_2O$  nanosheets.



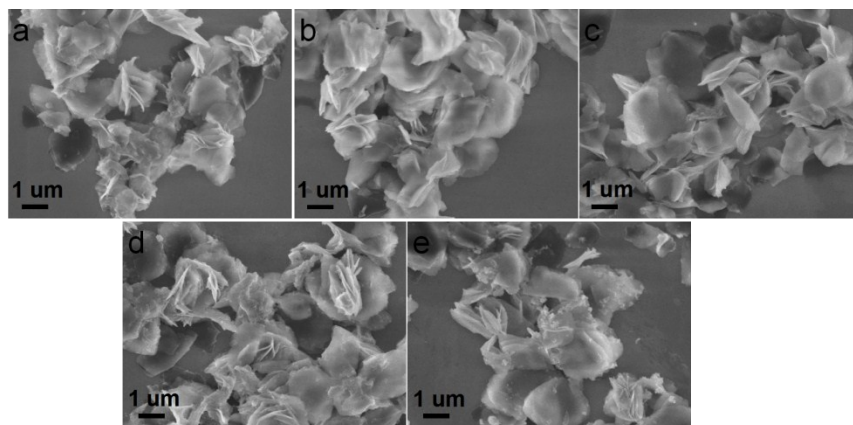

**Figure S2.** SEM images of amorphous metal hydroxide nanosheets (a)  $\text{Co}(\text{OH})_2$ , (b)  $\text{Mg}(\text{OH})_2$ , (c)  $\text{Zn}(\text{OH})_2$ , (d)  $\text{Mn}(\text{OH})_x$ , (e)  $\text{Fe}(\text{OH})_3$ .

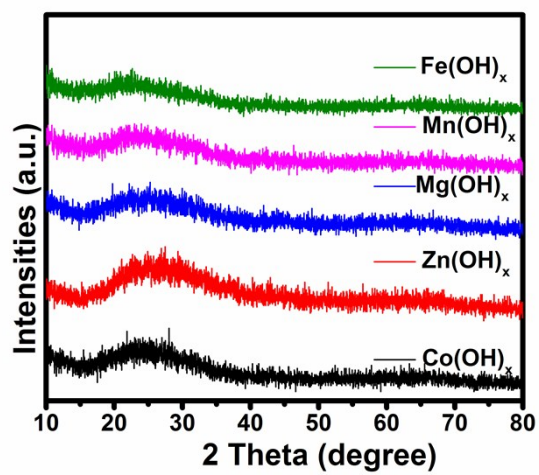

**Figure S3.** XRD patterns of metal hydroxide nanosheets.

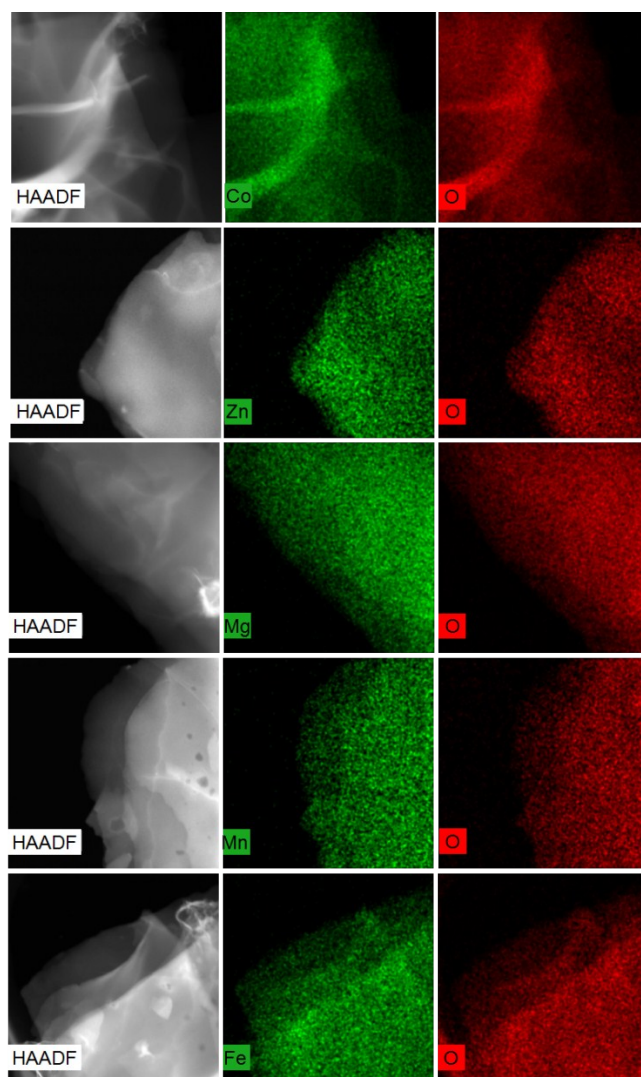

**Figure S4.**Elemental mapping images of amorphous metal hydroxide nanosheets.

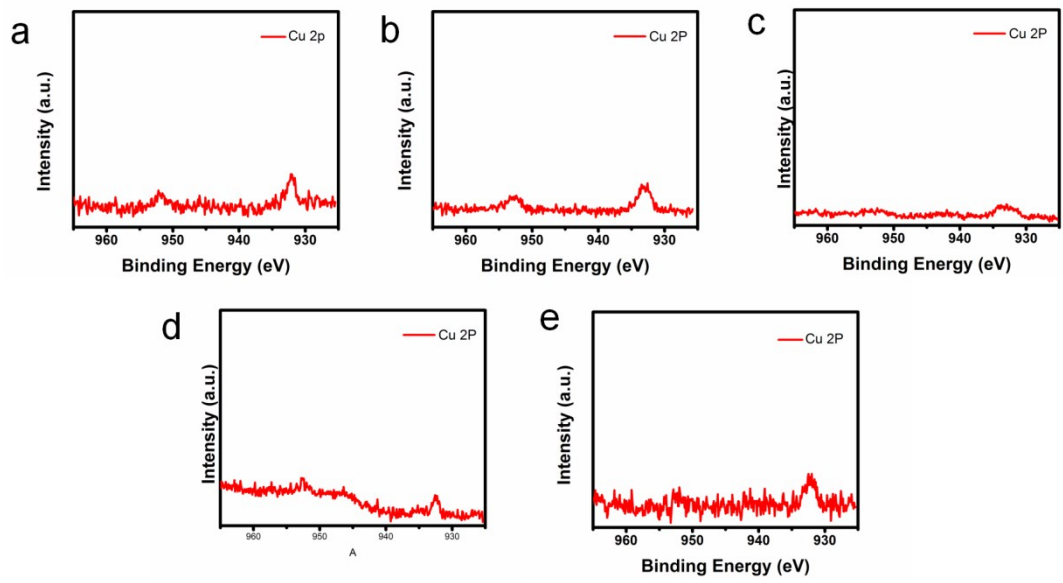

**Fig. S5.** The XPS spectra of Cu 2p in the amorphous  $M(OH)_x$  nanosheets, (a)  $Co(OH)_2$  (b)  $Zn(OH)_2$ , (c)  $Mg(OH)_2$ , (d)  $MnOH_2/MnOOH$ , and (e)  $Fe(OH)_3$ .

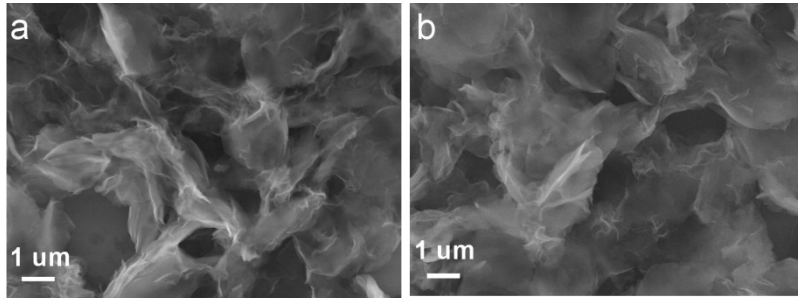

**Figure S6.** SEM images of different atomic ratios of amorphous  $\text{Co}_x\text{Zn}_y(\text{OH})_w$  nanosheets.



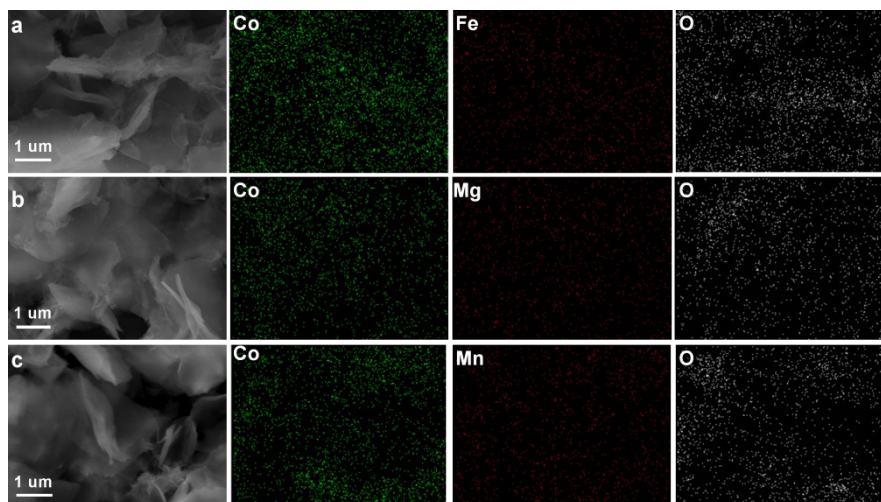

**Figure S7.** SEM images and elemental mapping images of (a) amorphous  $\text{Co}_x\text{Fe}_y(\text{OH})_w$  nanosheet, (b)  $\text{Co}_x\text{Mg}_y(\text{OH})_w$  nanosheet, and  $\text{Co}_x\text{Mn}_y(\text{OH})_w$  nanosheet.

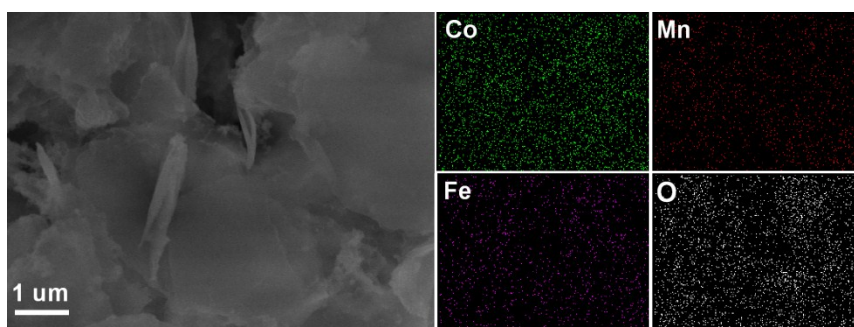

**Figure S8.** SEM image and elemental mapping images of amorphous  $\text{Co}_x\text{Mn}_y\text{Fe}_z(\text{OH})_w$  nanosheet.

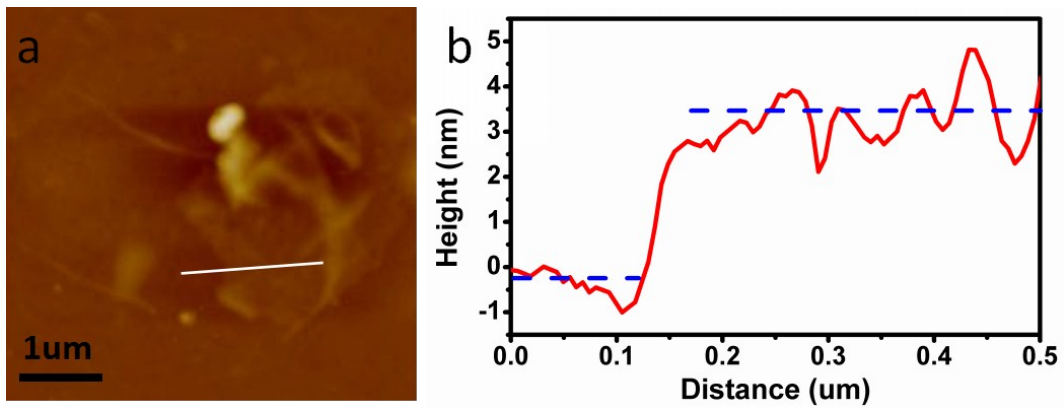

Figure S9. The AFM image (a) and AFM height image (b) of ta-Co(OH)<sub>2</sub> nanosheets.

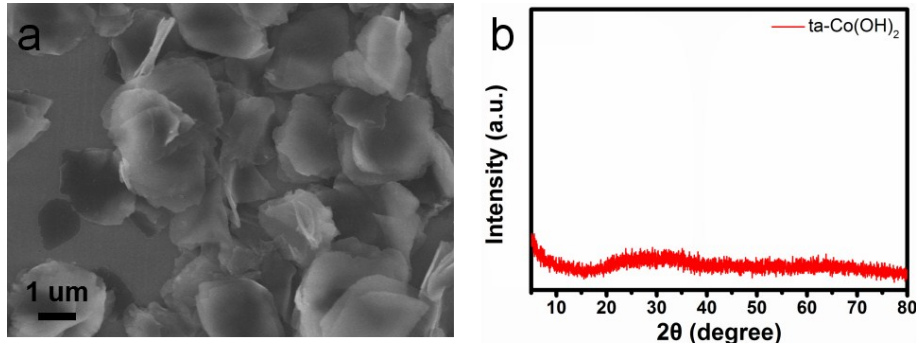

**Figure S10.** The SEM image (a) and XRD patterns (b) of ta-Co(OH)<sub>2</sub>.

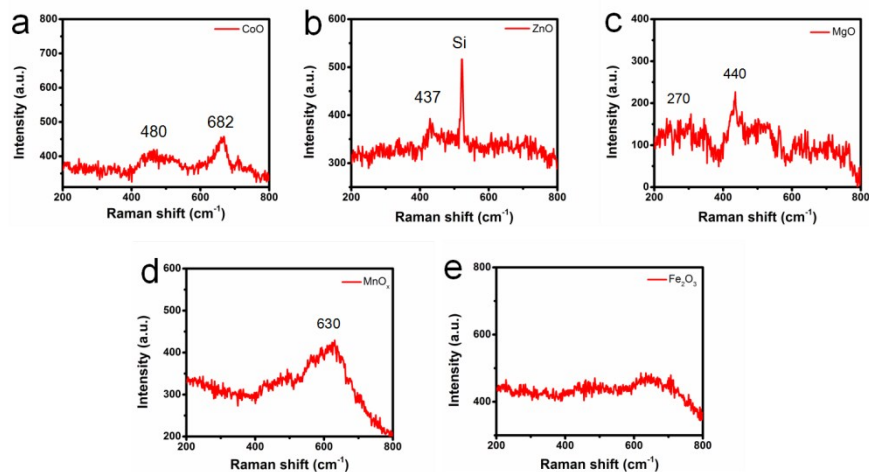

**Figure S11.** Raman spectra of metal oxide nanosheets.

Raman spectra of amorphous metal oxide nanosheets were also conducted in the range of 200-800  $\text{cm}^{-1}$ . As shown in Figure S11. The Raman peaks of amorphous  $\text{MO}_x$  become wider and weaker compared to corresponding crystalline  $\text{MO}_x$ . The Raman spectrum of annealed cobalt oxide is shown in Figure S15a. The peaks at 480 and 682  $\text{cm}^{-1}$  are the characteristic peaks for  $\text{CoO}$ .<sup>1</sup> Figure S15b shows a typical Raman scattering spectrum of amorphous  $\text{ZnO}$ . The peak at 437  $\text{cm}^{-1}$  can be assigned to  $E_2$  mode of  $\text{ZnO}$ , while the peak at 580  $\text{cm}^{-1}$  is not detected.<sup>2</sup> The Raman spectrum of amorphous  $\text{MgO}$  is shown in Figure S15c. The peaks at 270  $\text{cm}^{-1}$  and 440  $\text{cm}^{-1}$  are similar to the previous report for  $\text{MgO}$ .<sup>3</sup> Figure S15d shows a typical Raman scattering spectrum of amorphous  $\text{MnO}_x$ . In particular, the peak centered at 630  $\text{cm}^{-1}$  is characteristic of the  $\text{Mn}_2\text{O}_3$  species. Due to the wider width of the main peak, the peak at 580  $\text{cm}^{-1}$  is encapsulated.<sup>4</sup> Combining with the corresponding hydroxide nanosheets, the sample should be a mixture of  $\text{MnO}$  and  $\text{Mn}_2\text{O}_3$  (termed  $\text{MnO}_x$ ). For amorphous  $\text{Fe}_2\text{O}_3$ , the absorption bands in the range 200-800  $\text{cm}^{-1}$ , which are characteristic of the Fe-O vibration mode, are present in all the samples. The Raman spectrum of the samples is similar to the previous reports of the maghemite material.<sup>5</sup>

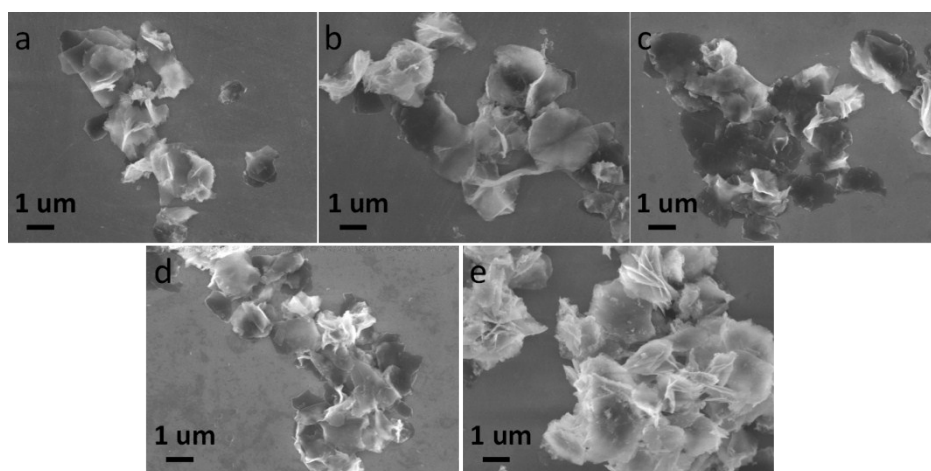

**Figure S12.** SEM images of amorphous metal oxide nanosheets (a) CoO, (b) MgO, (c) ZnO, (d) MnO<sub>x</sub>, (e) Fe<sub>2</sub>O<sub>3</sub>.

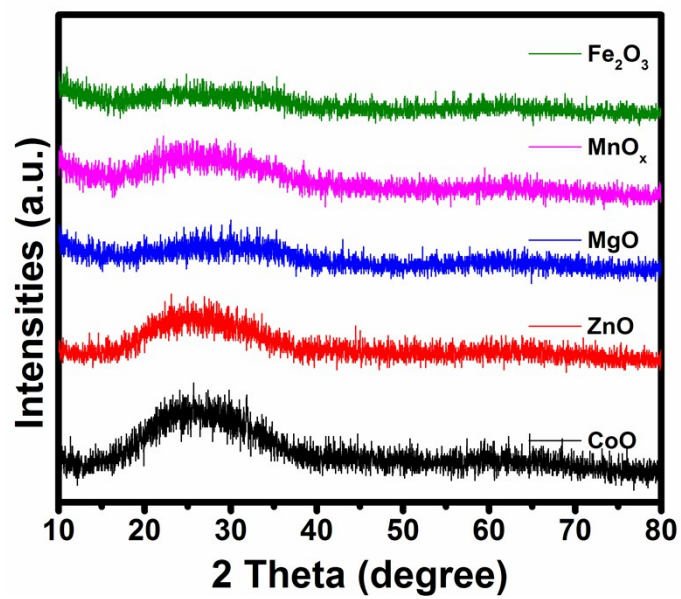

Figure S13. XRD patterns of metal oxide nanosheets.

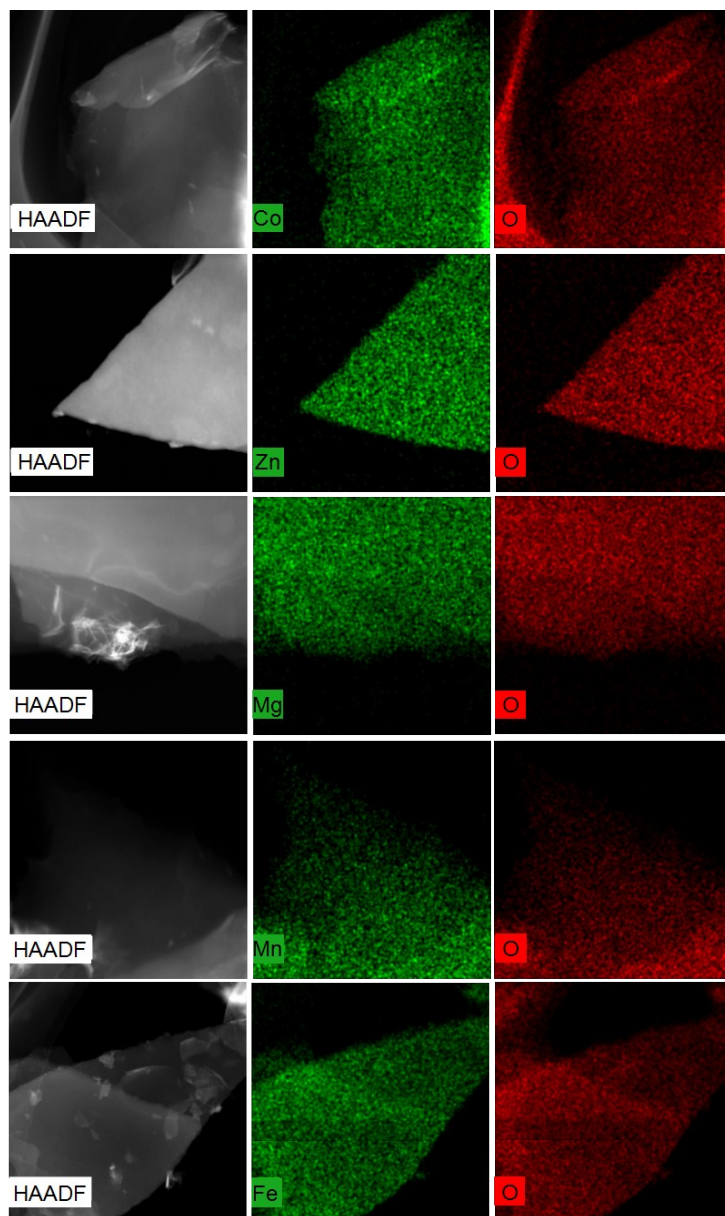

**Figure S14.** Elemental mapping images of amorphous metal oxide nanosheets.



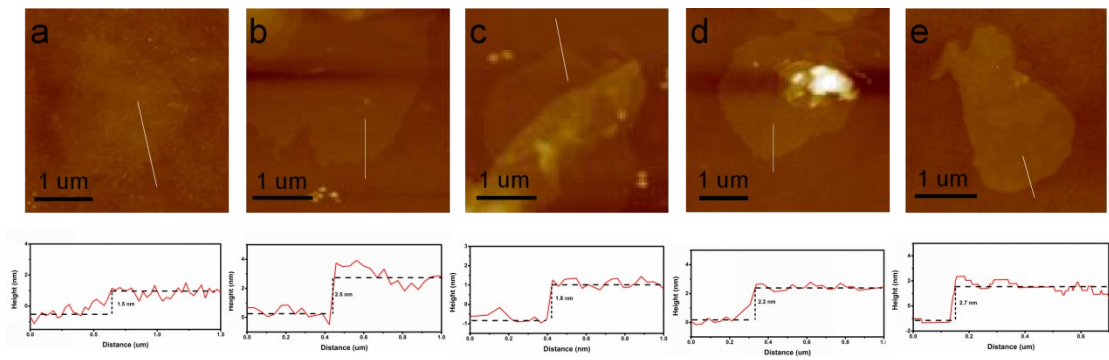

**Figure S15.** The AFM images and AFM height images of amorphous metal oxide nanosheets ((a) CoO, (b) ZnO, (c) MgO, (d) MnO<sub>x</sub>, (e) Fe<sub>2</sub>O<sub>3</sub>), respectively.

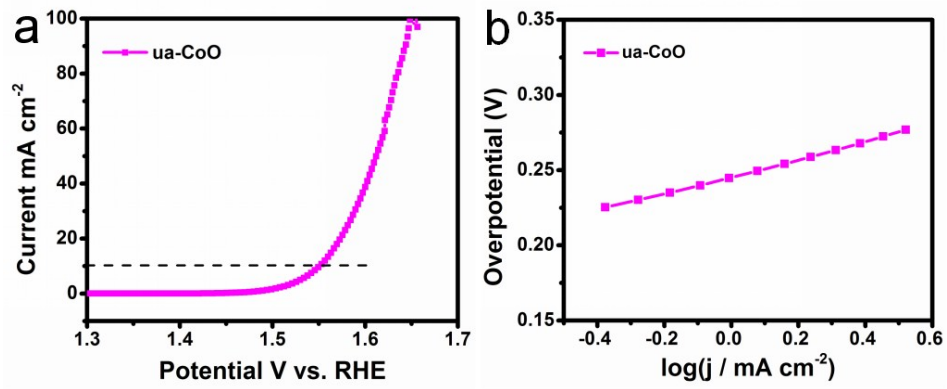

**Figure S16.** The OER activity of amorphous CoO nanosheets after calcination. (a) LSV curves (b) Tafel plots of amorphous CoO nanosheets.

**Table S1.** The  $K_{sp}$  and  $pK_{sp}$  of amorphous metal hydroxide nanosheets.

---

| sample     | $K_{sp}$               | $pK_{sp}$ |
|------------|------------------------|-----------|
| $Co(OH)_2$ | $5.92 \times 10^{-15}$ | 14.23     |
| $Zn(OH)_2$ | $3 \times 10^{-17}$    | 16.5      |
| $Mg(OH)_2$ | $1.8 \times 10^{-11}$  | 10.74     |
| $Mn(OH)_2$ | $1.9 \times 10^{-13}$  | 12.72     |
| $Fe(OH)_2$ | $4.87 \times 10^{-17}$ | 16.31     |

---

**Table S2.** The thickness of amorphous metal hydroxide nanosheets.

| sample         | Co(OH) <sub>2</sub> | Zn(OH) <sub>2</sub> | Mg(OH) <sub>2</sub> | Mn(OH) <sub>x</sub> | Fe(OH) <sub>3</sub> |
|----------------|---------------------|---------------------|---------------------|---------------------|---------------------|
| thickness (nm) | 1.4                 | 2.4                 | 1.6                 | 1.9                 | 2.7                 |

Table S3. The atomic ratio of M and Cu tested by ICP.

| sample              | Atomic %(M) | Atomic % (Cu) |
|---------------------|-------------|---------------|
| Co(OH) <sub>2</sub> | 92.6        | 7.4           |
| Zn(OH) <sub>2</sub> | 93.4        | 6.6           |
| Mg(OH) <sub>2</sub> | 97.2        | 2.8           |
| Mn(OH) <sub>x</sub> | 98.2        | 2             |
| Fe(OH) <sub>3</sub> | 96.5        | 3.5           |

**Table S4.** The thickness of amorphous metal hydroxide nanosheets.

| sample         | CoO | ZnO | MgO | MnO <sub>x</sub> | Fe <sub>2</sub> O <sub>3</sub> |
|----------------|-----|-----|-----|------------------|--------------------------------|
| thickness (nm) | 1.2 | 2.5 | 1.8 | 2.2              | 2.7                            |

**Table S5.** Comparison of the amorphous Co(OH)<sub>2</sub> catalysts with recently reported Co-based catalysts.

| catalysts                                                 | $\eta$ (10mA cm <sup>-2</sup> ) (V) | Tafel slope (mV dec <sup>-1</sup> ) | references |
|-----------------------------------------------------------|-------------------------------------|-------------------------------------|------------|
| ua-Co(OH) <sub>2</sub> nanosheet                          | 0.267                               | 34.4                                | Our work   |
| Gelled-FeCoW                                              | 0.223                               | 37                                  | Ref. 6     |
| Co(OH)F                                                   | 0.313                               | 53                                  | Ref. 7     |
| CoOOH nanosheets                                          | 0.3                                 | 38                                  | Ref. 8     |
| CoMn LDH                                                  | 0.324                               | 43                                  | Ref. 9     |
| plasma-engraved Co <sub>3</sub> O <sub>4</sub> nanosheets | 0.3                                 | 68                                  | Ref. 10    |
| Co(SxSe <sub>1-x</sub> ) <sub>2</sub> Nanoparticles       | 0.283                               | 65.6                                | Ref. 11    |
| Fe <sub>0.33</sub> Co <sub>0.67</sub> OOH                 | 0.266                               | 30                                  | Ref. 12    |
| Amorphous Co(OH) <sub>2</sub>                             | 0.36                                | 56                                  | Ref. 13    |
| $\alpha$ -Co(OH) <sub>2</sub> nanosheets                  | 0.317                               | 49                                  | Ref. 14    |
| Ni <sub>0.6</sub> Co <sub>1.4</sub> P Nanocages           | 0.3                                 | 80                                  | Ref. 15    |

## References

- 1 S. G. Kandalkar, C.D. Lokhande, R.S.Mane and S. H. Han, *Appl. Surf. Sci.*, 2007, **253**, 3952.
- 2 Z.J. Wang, H. M. Zhang, Z. J. Wang, L. G. Zhang, J. S. Yuan, S. G. Yan and C.Y. Wang, *J. Mater. Res.*, 2003, **18**, 151.
- 3 T. S. Duffy , C. Meade, Y. W. Fei, H. K. Mao and R. J. Hemley, *Am. Mineral*, 1995, **80**, 222.
- 4 Y. T. Hu and J. Wang, *J. Power Sources*, 2015, **286**, 394.
- 5 Y. L. Zheng, W. Z. Wang, D. Jiang and L. Zhang, *Chem. Eng. J.*, 2016, **284**, 21
- 6 B. Zhang, X. L. Zheng, O. Voznyy, R. Comin, M. Bajdich, M. Garcia-Melchor, L. L. Han, J. X. Xu, M. Liu, L. R. Zheng, F. P. G. de Arquer, C. T. Dinh, F. J. Fan, M. J. Yuan, E. Yassitepe, N. Chen, T. Regier, P. F. Liu, Y. H. Li, P. De Luna, A. Janmohamed, H. L. L. Xin, H. G. Yang, A. Vojvodic and E. H. Sargent, *Science*, 2016, **352**, 333.
- 7 S. Wan, J. Qi, W. Zhang, W. Wang, S. Zhang, K. Liu, H. Zheng, J. Sun, S. Wang and R. Cao, *Adv. Mater.*, 2017, **29**, 1700286.
- 8 J. H. Huang, J. T. Chen, T. Yao, J. F. He, S. Jiang, Z. H. Sun, Q. H. Liu, W. R. Cheng, F. C. Hu, Y. Jiang, Z. Y. Pan and S. Q. Wei, *Angew. Chem. Int. Ed.*, 2015, **54**, 8722.
- 9 F. Song and X. L. Hu, *J. Am. Chem. Soc.*, 2014, **136**, 16481.
- 10 L. Xu, Q. Q. Jiang, Z. H. Xiao, X. Y. Li, J. Huo, S. Y. Wang and L. M. Dai, *Angew. Chem. Int. Ed.*, 2016, **55**, 5277.
- 11 L. Fang, W. X. Li, Y. X. Guan, Y. Y. Feng, H. J. Zhang, S. L. Wang and Y. Wang, *Adv. Funct. Mater.*, 2017, **27**, 1701008.
- 12 S. H. Ye, Z. X. Shi, J. X. Feng, Y. X. Tong and G. R. Li, *Angew. Chem. Int. Ed.*, 2018, **57**, 2672.
- 13 M. Abu Sayeed, T. Herd and A. P. O'Mullane, *J. Mater. Chem. A.*, 2016, **4**, 991.
- 14 Y. M. Jiang, X. Li, T. X. Wang and C. M. Wang, *Nanoscale*, 2016, **8**, 9667.
- 15 B. C. Qiu, L. J. Cai, Y. Wang, Z. Y. Lin, Y. P. Zuo, M. Y. Wang and Y. Chai, *Adv. Funct. Mater.*, 2018, **28**, 1706008.
